# Supplementary material for: Doc2b Ca2+ binding site mutants enhance synaptic release at rest at the expense of sustained synaptic strength
Source: PubMed Central journal article supplement (PMC6783474; doi:10.1038/s41598-019-50684-1), 2019-10-08
Supplement: 41598_2019_50684_MOESM1_ESM.pdf [file 41598_2019_50684_MOESM1_ESM.pdf]

## **Supplementary Information**

Title:

Doc2b Ca<sup>2+</sup> binding site mutants enhance synaptic release at rest at the expense of sustained synaptic strength

Authors:

Quentin Bourgeois-Jaarsma<sup>1</sup>, Matthijs Verhage<sup>1,2</sup>, Alexander J. Groffen<sup>1,2\*</sup>

### **Contents:**

Supplementary figures S1 – S5

Supplementary Table 1

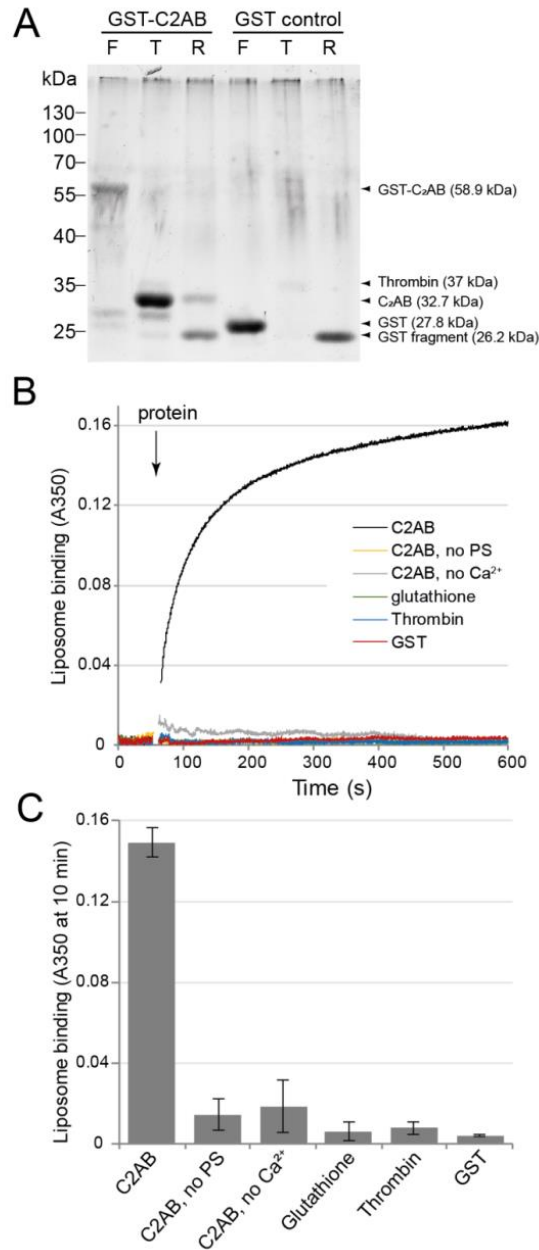

**Supplementary Figure S1:** Liposome binding by GST fusion proteins depends on PS and Ca<sup>2+</sup> and is not attributable to GST, thrombin or glutathione. **(A)** SDS-PAGE analysis of recombinant GST-C2AB or GST alone expressed in E.coli. F indicates full-length fusion protein, eluted from glutathione-Sepharose beads with 5 mM soluble glutathione; T indicates a protein fragment eluted from the beads by proteolytic cleavage with thrombin; R indicates the residual GST fragment remaining on the beads after thrombin cleavage, subsequently eluted with 5 mM glutathione. Predicted molecular weights are indicated at the right. **(B)** Kinetic traces of phospholipid binding, quantitated as absorption at 350 nm in presence of 834 nM [Ca<sup>2+</sup>]<sub>free</sub> and liposomes containing DOPC/DOPS (80/20) unless indicated otherwise. After 60 s (arrow) the indicated sample was added: C2AB (50  $\mu$ l of fraction 'T' shown in panel A), GST (50  $\mu$ l of fraction 'F'), thrombin (50  $\mu$ l containing 2.5U, equal amount as in fractions 'T'), glutathione (50  $\mu$ l of 5 mM glutathione, equal as in fractions 'F'). For the 'no PS' control, 100% DOPC liposomes were used. For the 'no Ca<sup>2+</sup>' control, a buffer containing 10 mM EGTA was used. **(C)** As a measure for total phospholipid binding, the A350 from the last 20 s was averaged. Graph represents mean  $\pm$  sem of 2-4 assays (C2AB: n=4; others: n=2).

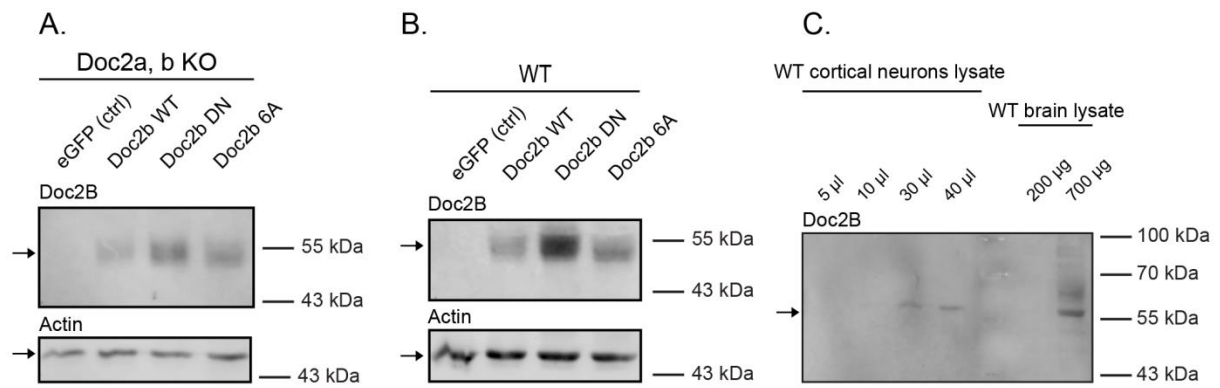

**Supplementary Figure S2.** Doc2b expression levels in wildtype and Doc2a,b double knockout (DKO) neurons. Western blots from (A) DKO and (B) WT high density neuron cultures overexpressing wildtype or mutant Doc2b confirming the overexpression of Doc2b<sup>WT</sup> and mutants by lentiviral particles. Each lane contains the lysate from 100K cortical cells transduced at 1 DIV and harvested at 17 DIV. (C) Endogenous Doc2b could not be detected in standard conditions but became detectable by loading larger sample volumes of cortex or total brain lysate ( $\mu$ g indicates total wet weight of brain tissue). Doc2b immunoreactivity in overexpressing neurons was higher compared to endogenous levels in non-transfected wildtype neurons. For cropped blots, full-length blots are available in the replication dataset as detailed in the Data Availability Statement.

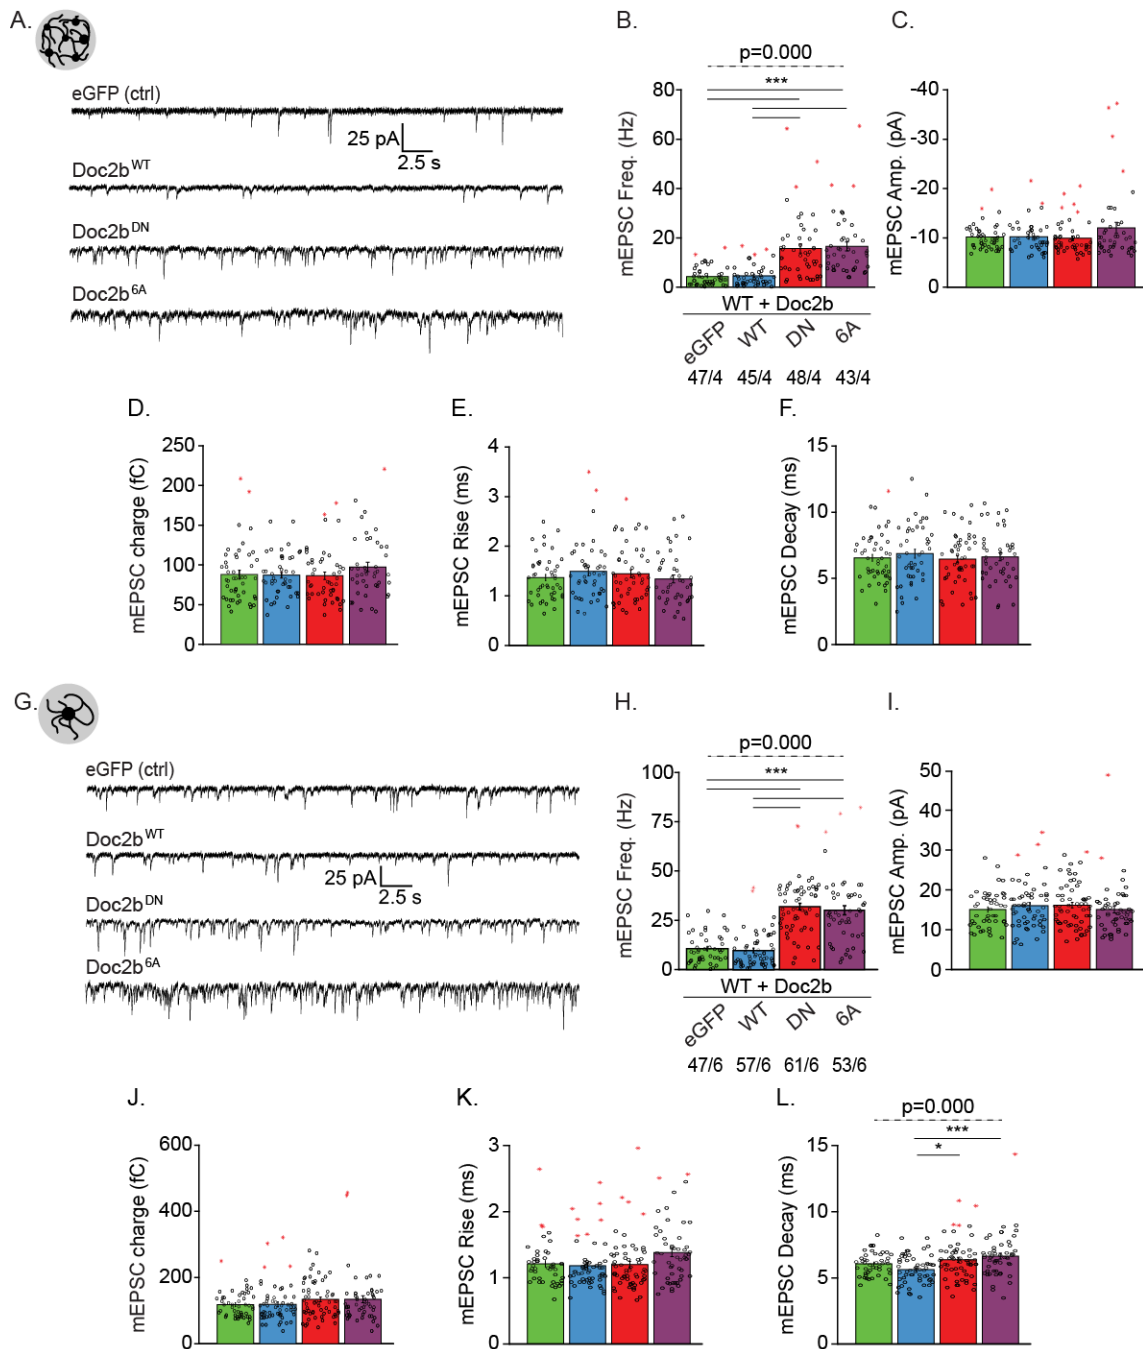

**Supplementary Figure S3.** Doc2b<sup>DN</sup> and Doc2b<sup>6A</sup> mutations enhance the frequency of spontaneous release in wildtype hippocampal neurons. **(A)** Representative mEPSC recordings in wildtype neurons overexpressing eGFP (ctrl), Doc2b<sup>WT</sup> or mutants (Doc2b<sup>DN</sup>, Doc2b<sup>6A</sup>), cultured in networks in presence of 1  $\mu$ M TTX and 20  $\mu$ M gabazine. **(B)** Quantification of spontaneous neurotransmitter release frequency and **(C-F)** amplitude, charge, rise and decay time. **(G)** Representative recordings in isolated neurons cultured on microglial islands (autapses). **(H-L)** Quantification of the frequency and postsynaptic parameters. Data are represented as mean  $\pm$  SEM; Kruskal Wallis ANOVA, Pairwise Post-hoc tests (\*\*\*, p<0.005). Red stars signs indicate outliers. The number of cells (n) and the number of independent experiments (N) are indicated as “n/N”.

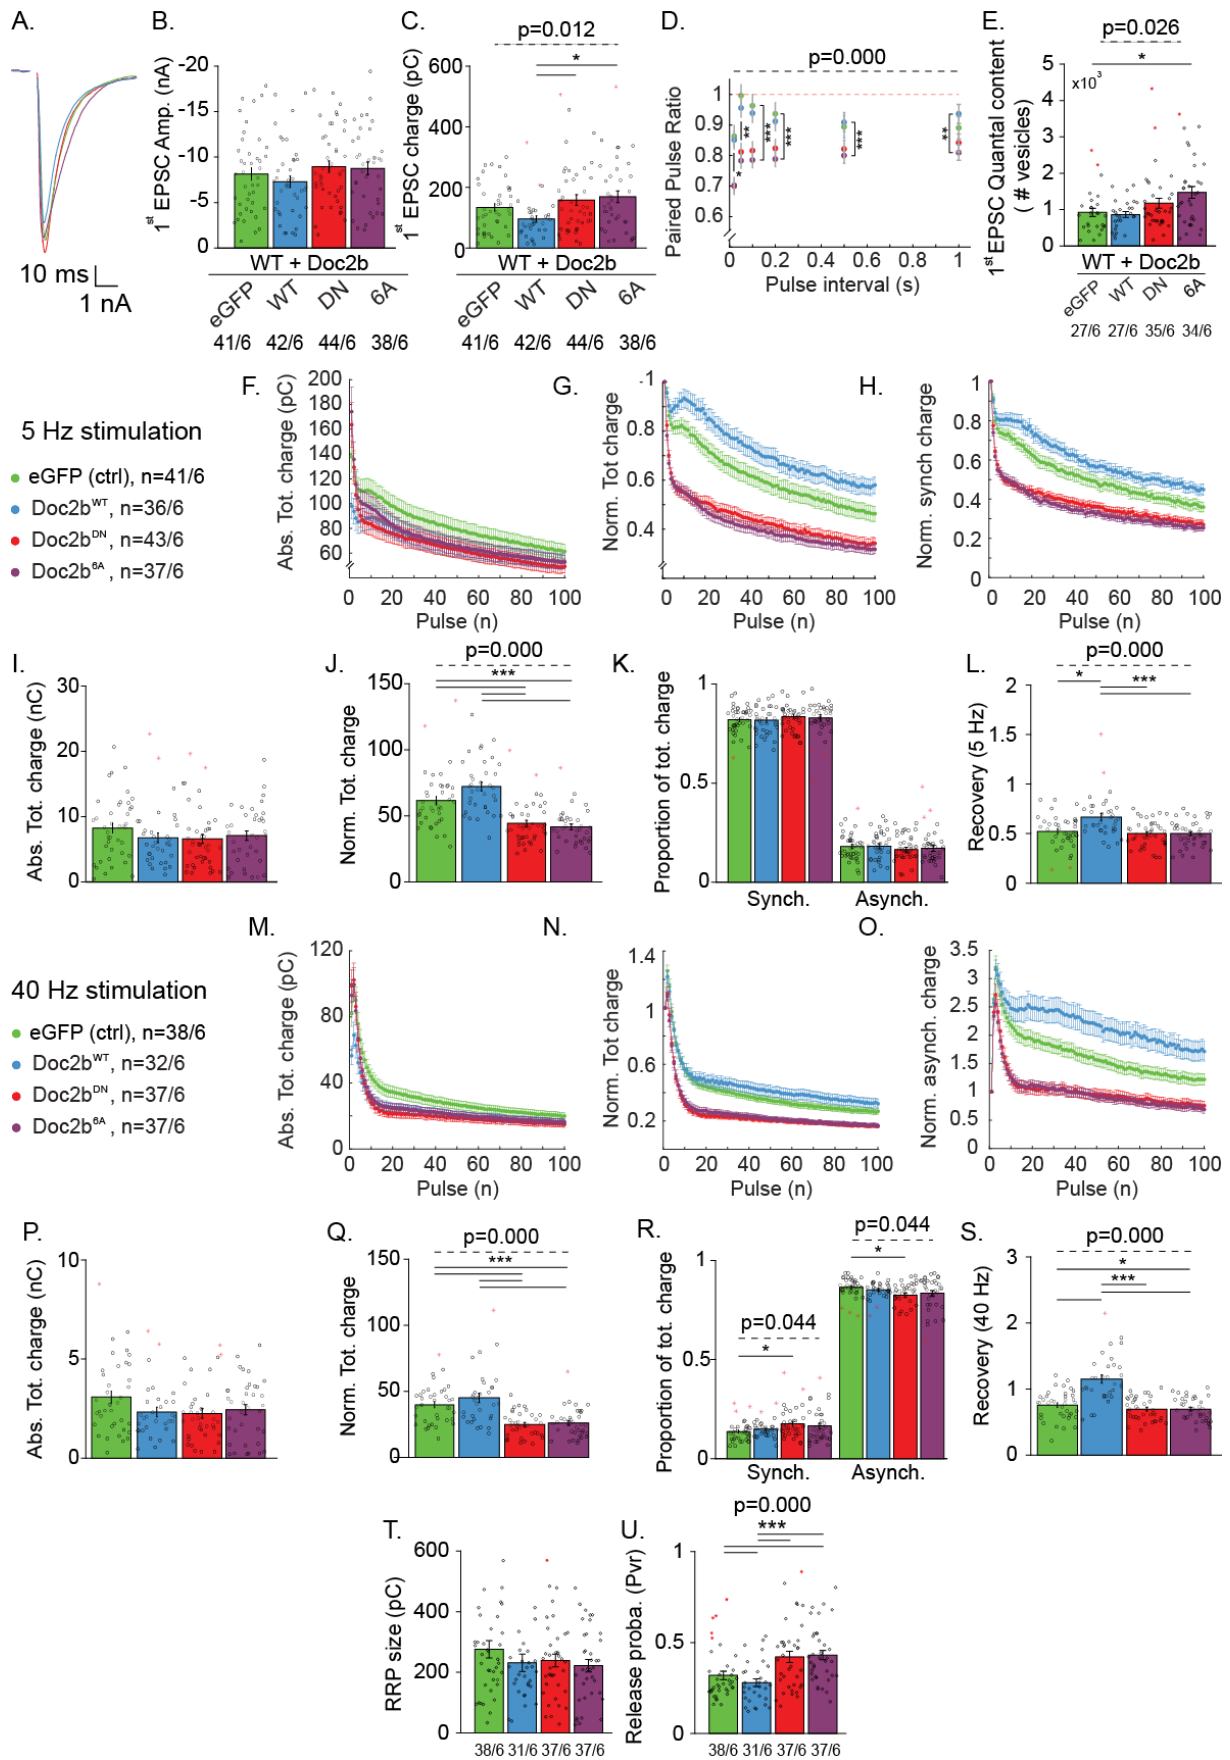

**Supplementary Figure S4.** Doc2b mutants affect short term plasticity in WT autaptic neurons. (A) Averaged trace of a single EPSC from wildtype neurons overexpressing Doc2b<sup>WT</sup> and mutants. (B) Quantification of 1<sup>st</sup> EPSC amplitude and charge (C). (D) Paired-pulse ratio. (E) Single EPSC quantal content corresponding to the ratio of the EPSC charge and mEPSC charge. Doc2b<sup>DN</sup> and Doc2b<sup>6A</sup> affect vesicle release probability and thus short-term plasticity. (F-L) Rundown during repetitive stimulation for 100 AP at 5 Hz. (F) Absolute (G), normalized total charge (H) and normalized synchronous release. (I) Cumulated absolute and (J) normalized total charge from the entire train. (K) Proportion of the synchronous and asynchronous component. (L) Recovery pulse 2s after 5 Hz stimulation. (M-S) Rundown during repetitive stimulation for 100 AP at 40 Hz. (M) Absolute and (N) Normalized total charge. (O) Normalized asynchronous release. (P) Cumulated absolute and (Q) normalized total charge during the entire train. (R) Proportion of the synchronous and asynchronous component. (S) Recovery, measured after a 40 Hz train. Data are represented as mean  $\pm$ SEM; Kruskal Wallis ANOVA and one way repeated ANOVA, Pairwise Post-hoc tests (\*,  $p < 0.05$ , \*\*,  $p < 0.01$ , \*\*\*,  $p < 0.005$ ). Red stars signs indicate outliers. The number of recordings (n) and the number of independent experiments (N) are indicated as “n/N”.

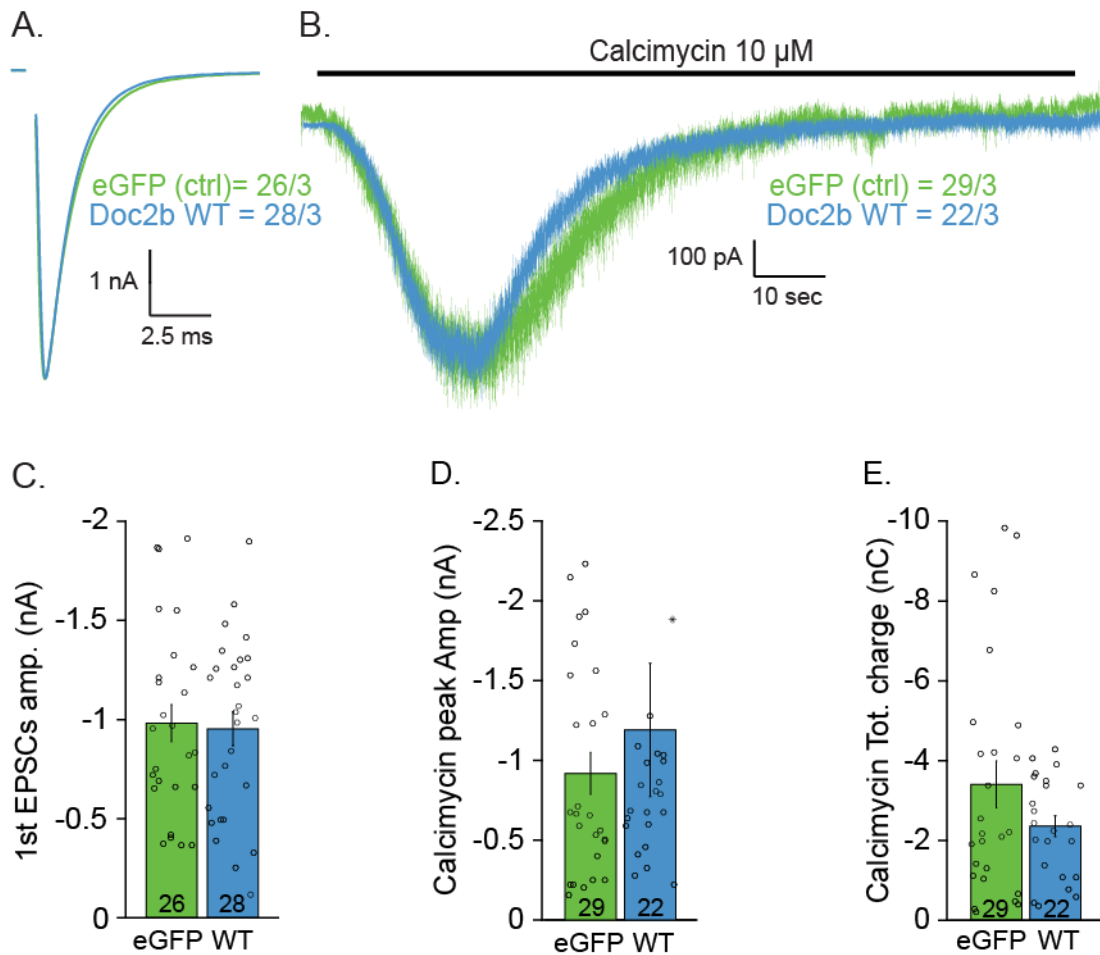

**Supplementary Figure S5.** Overexpression of wildtype Doc2b does not affect calcimycin-induced neurotransmitter release. Calcimycin was perfused to directly induce  $\text{Ca}^{2+}$  influx and bypass voltage-dependent  $\text{Ca}^{2+}$  channels. **(A)** Typical example of single EPSC in naïve wildtype autaptic neurons; **(B)** the EPSC induced by puff application of calcimycin for 100 s. **(C)** Quantification of EPSC amplitude. **(D)** Calcimycin-induced response peak amplitude and **(E)** total charge transfer. Data are represented as mean  $\pm$ SEM. Red stars signs indicate outliers. The number of recordings (n) and the number of independent experiments (N) are indicated as “n/N”.

## Supplementary Table1. Statistical analysis

| Figure references | Statistical test (between groups comparison) |                              |         |                  |                 | Accepted $\alpha$ -significance     | Sample                                                           |                                                                 |
|-------------------|----------------------------------------------|------------------------------|---------|------------------|-----------------|-------------------------------------|------------------------------------------------------------------|-----------------------------------------------------------------|
|                   |                                              | <sup>(1)</sup> Friedman Test |         |                  |                 |                                     | 0,05                                                             | n = 26 ROIs ,<br>N = 6<br>independent<br>experiment<br>Figure 2 |
|                   | Statistical test (within groups comparison)  |                              |         |                  |                 | 0,05                                |                                                                  |                                                                 |
|                   | Pairwise comparison                          |                              |         |                  |                 |                                     |                                                                  |                                                                 |
| E                 | Parameter                                    | Statistical result           | p-value | Statistical test | Effect size (r) | Descriptive and pairwise comparison |                                                                  |                                                                 |
|                   | Ratio PM/C                                   | $\chi^2(3)=46,108$           | p=0,000 | <sup>(1)</sup>   | 0,639           | groups                              | comparisons                                                      | Corrected p-value                                               |
|                   |                                              |                              |         |                  |                 | WT basal: 0,73 ± 0,04               | WT basal vs WT KCl                                               | p=0,000                                                         |
|                   |                                              |                              |         |                  |                 | WT KCl: 1,21 ± 0,07                 | WT basal vs DN basal                                             | p=0,016                                                         |
|                   |                                              |                              |         |                  |                 | DN basal: 0,98 ± 0,03               | WT basal vs DN KCl                                               | p=0,000                                                         |
|                   |                                              |                              |         |                  |                 | DN KCl: ± 1,31 ± 0,06               | DN basal vs WT KCl                                               | p=0,643                                                         |
|                   | DN basal vs DN KCl                           | p=0,002                      |         |                  |                 |                                     |                                                                  |                                                                 |
|                   |                                              | WT KCl vs DN KCl             | p=0,319 |                  |                 |                                     |                                                                  |                                                                 |
| Figure references | <sup>(1)</sup> Friedman Test                 |                              |         |                  |                 | 0,05                                | n = 36 ROIs ,<br>N = 11<br>independent<br>experiment<br>Figure 2 |                                                                 |
|                   | Statistical test (within groups comparison)  |                              |         |                  |                 | 0,05                                |                                                                  |                                                                 |
|                   | Pairwise comparison                          |                              |         |                  |                 |                                     |                                                                  |                                                                 |
| J                 | Parameter                                    | Statistical result           | p-value | Statistical test | Effect size (r) | Descriptive and pairwise comparison |                                                                  |                                                                 |
|                   | Ratio PM/C                                   | $\chi^2(3)=63,503$           | p=0,000 | <sup>(1)</sup>   | 0,638           | groups                              | comparisons                                                      | Corrected p-value                                               |
|                   |                                              |                              |         |                  |                 | WT basal: 0,68 ± 0,03               | WT basal vs WT KCl                                               | p=0,000                                                         |
|                   |                                              |                              |         |                  |                 | WT KCl: 1,16 ± 0,04                 | WT basal vs 6A basal                                             | p=0,000                                                         |
|                   |                                              |                              |         |                  |                 | 6A basal: 0,93 ± 0,05               | 6A basal vs 6A KCl                                               | p=1                                                             |
|                   |                                              |                              |         |                  |                 | 6A KCl: ± 0,99 ± 0,07               | WT basal vs 6A KCl                                               | p=0,000                                                         |
|                   | WT KCl vs 6A KCl                             | p=0,001                      |         |                  |                 |                                     |                                                                  |                                                                 |
|                   |                                              | WT KCl vs 6A basal           | p=0,001 |                  |                 |                                     |                                                                  |                                                                 |

  

| Figure references     | Statistical test (between groups comparison) |                                    |                |                  |                 | Accepted $\alpha$ -significance     | Sample                       |
|-----------------------|----------------------------------------------|------------------------------------|----------------|------------------|-----------------|-------------------------------------|------------------------------|
|                       |                                              | <sup>(2)</sup> Kruskal-Wallis Test |                |                  |                 |                                     | 0,05                         |
| H                     | Parameter                                    | Statistical result                 | p-value        | Statistical test | Effect size (r) | Descriptive and pairwise comparison |                              |
|                       | [Ca2+]free = 2,2 nM                          | H(2)=11,580                        | p=0,003        | <sup>(2)</sup>   | 2,990           |                                     |                              |
|                       | [Ca2+]free = 7 nM                            | H(2)=9,620                         | p=0,008        | <sup>(2)</sup>   | 2,484           |                                     |                              |
|                       | [Ca2+]free = 36 nM                           | H(2)=10,288                        | p=0,006        | <sup>(2)</sup>   | 2,656           |                                     |                              |
|                       | [Ca2+]free = 163 nM                          | H(2)=10,593                        | p=0,005        | <sup>(2)</sup>   | 2,735           |                                     |                              |
|                       | [Ca2+]free = 509 nM                          | H(2)=6,228                         | p=0,044        | <sup>(2)</sup>   | n.a.            |                                     |                              |
|                       | [Ca2+]free = 655 nM                          | H(2)=14,332                        | p=0,001        | <sup>(2)</sup>   | 3,700           |                                     |                              |
|                       | [Ca2+]free = 834 nM                          | H(2)=11,863                        | p=0,003        | <sup>(2)</sup>   | 3,063           |                                     |                              |
|                       | [Ca2+]free = 1075 nM                         | H(2)=11,580                        | p=0,003        | <sup>(2)</sup>   | 3,000           |                                     |                              |
|                       | [Ca2+]free = 2637 nM                         | H(2)=11,580                        | p=0,003        | <sup>(2)</sup>   | 3,000           |                                     |                              |
| [Ca2+]free = 10941 nM | H(2)=11,580                                  | p=0,003                            | <sup>(2)</sup> | 3,000            |                 |                                     |                              |
| Figure reference      | Statistical test (between groups comparison) |                                    |                |                  |                 | Accepted $\alpha$ -significance     | Sample                       |
|                       | <sup>(2)</sup> Kruskal-Wallis Test           |                                    |                |                  |                 | 0,05                                | n =12 , N = 4<br>independent |
| P                     | Parameter                                    | Statistical result                 | p-value        | Statistical test | Effect size (r) | Descriptive and pairwise comparison |                              |
|                       | [Ca2+]free = 2,2 nM                          | H(2)=8,346                         | p=0,015        | <sup>(2)</sup>   | 2,409           |                                     |                              |
|                       | [Ca2+]free = 7 nM                            | H(2)=9,269                         | p=0,010        | <sup>(2)</sup>   | 2,676           |                                     |                              |
|                       | [Ca2+]free = 36 nM                           | H(2)=8,346                         | p=0,015        | <sup>(2)</sup>   | 2,409           |                                     |                              |
|                       | [Ca2+]free = 163 nM                          | H(2)=6,500                         | p=0,039        | <sup>(2)</sup>   | 1,876           |                                     |                              |
|                       | [Ca2+]free = 509 nM                          | H(2)=9,846                         | p=0,007        | <sup>(2)</sup>   | 2,842           |                                     |                              |
|                       | [Ca2+]free = 655 nM                          | H(2)=7,423                         | p=0,024        | <sup>(2)</sup>   | 2,143           |                                     |                              |
|                       | [Ca2+]free = 834 nM                          | H(2)=8,769                         | p=0,012        | <sup>(2)</sup>   | 2,531           |                                     |                              |
|                       | [Ca2+]free = 1075 nM                         | H(2)=7,538                         | p=0,023        | <sup>(2)</sup>   | 2,176           |                                     |                              |
|                       | [Ca2+]free = 2637 nM                         | H(2)=4,154                         | p=0,125        | <sup>(2)</sup>   | n.a.            |                                     |                              |
| [Ca2+]free = 10941 nM | H(2)=3,500                                   | p=0,174                            | <sup>(2)</sup> | n.a.             |                 |                                     |                              |



**Figure 4. Doc2b Ca<sup>2+</sup>-binding-site mutants enhance the frequency of spontaneous release in Doc2-deficient hippocampal neurons**

| Figure references | Statistical test (between groups comparison) |             |                  |                 |                                     | Accepted $\alpha$ -significance |                   | Sample  |
|-------------------|----------------------------------------------|-------------|------------------|-----------------|-------------------------------------|---------------------------------|-------------------|---------|
|                   | <sup>(1)</sup> Kruskal-Wallis Test           |             |                  |                 |                                     | 0.01                            |                   |         |
|                   | Statistical test (within groups comparison)  |             |                  |                 |                                     | 0.05                            |                   |         |
|                   | Pairwise comparison                          |             |                  |                 |                                     |                                 |                   |         |
| Parameter         | Statistical result                           | p-value     | Statistical test | Effect size (r) | Descriptive and pairwise comparison |                                 |                   |         |
|                   |                                              |             |                  |                 | groups                              | comparisons                     | Corrected p-value |         |
| B                 | mEPSC frequency                              | H(3)=64,111 | p=0,000          | <sup>(1)</sup>  | 4,568                               | eGFP*: 10,01 ± 1,424            | eGFP vs WT        | p=1     |
|                   |                                              |             |                  |                 |                                     | WT*: 13,27 ± 1,568              | eGFP vs DN        | p=0,000 |
|                   |                                              |             |                  |                 |                                     | DN*: 28,08 ± 3,226              | eGFP vs 6A        | p=0,000 |
|                   |                                              |             |                  |                 |                                     | 6A*: 35,23 ± 2,188              | WT vs DN          | p=0,002 |
|                   |                                              |             |                  |                 | WT vs 6A                            | p=0,000                         |                   |         |
|                   |                                              |             |                  |                 | DN vs 6A                            | p=0,095                         |                   |         |
| C                 | mEPSC amplitude                              | H(3)=1,465  | p=0,690          | <sup>(1)</sup>  | n.a.                                |                                 |                   |         |
| D                 | mEPSC charge                                 | H(3)=11,767 | p=0,008          | <sup>(1)</sup>  | 0,838                               | eGFP*: 89,35 ± 8,384            | eGFP vs WT        | p=1     |
|                   |                                              |             |                  |                 |                                     | WT*: 85,44 ± 8,168              | eGFP vs DN        | p=1     |
|                   |                                              |             |                  |                 |                                     | DN*: 86,10 ± 9,856              | eGFP vs 6A        | p=0,591 |
|                   |                                              |             |                  |                 |                                     | 6A*: 123,65 ± 10,402            | WT vs DN          | p=1     |
|                   |                                              |             |                  |                 | WT vs 6A                            | p=0,016                         |                   |         |
|                   |                                              |             |                  |                 | DN vs 6A                            | p=0,027                         |                   |         |
| E                 | mEPSC rise                                   | H(3)=3,599  | p=0,308          | <sup>(1)</sup>  | n.a.                                |                                 |                   |         |
| F                 | mEPSC decay                                  | H(3)=6,849  | p=0,077          | <sup>(1)</sup>  | n.a.                                |                                 |                   |         |

**Figure 5. Ca<sup>2+</sup> binding site mutants Doc2bDN and Doc2b6A enhance short-term depression in Doc2-deficient neurons**

| Figure references | Statistical test (between groups comparison)   |               |                  |                 |                                     | Accepted $\alpha$ -significance |                   | Sample  |
|-------------------|------------------------------------------------|---------------|------------------|-----------------|-------------------------------------|---------------------------------|-------------------|---------|
|                   | <sup>(1)</sup> Kruskal-Wallis Test             |               |                  |                 |                                     | 0,025                           |                   |         |
|                   | Statistical test (within groups comparison)    |               |                  |                 |                                     | 0.05                            |                   |         |
|                   | Pairwise comparison                            |               |                  |                 |                                     |                                 |                   |         |
| Parameter         | Statistical result                             | p-value       | Statistical test | Effect size (r) | Descriptive and pairwise comparison |                                 |                   |         |
|                   |                                                |               |                  |                 | groups                              | comparisons                     | Corrected p-value |         |
| B                 | 1st EPSC amplitude                             | H(3)=6,481    | p=0,090          | <sup>(1)</sup>  | n.a.                                |                                 |                   |         |
| C                 | 1st EPSC charge                                | H(3)=6,279    | p=0,099          | <sup>(1)</sup>  | n.a.                                |                                 |                   |         |
| Figure references | Statistical test (between groups comparison)   |               |                  |                 |                                     | Accepted $\alpha$ -significance |                   | Sample  |
|                   | <sup>(1)</sup> Kruskal-Wallis Test             |               |                  |                 |                                     | 0,025                           |                   |         |
|                   | Statistical test (within groups comparison)    |               |                  |                 |                                     | 0.05                            |                   |         |
|                   | Pairwise comparison                            |               |                  |                 |                                     |                                 |                   |         |
| Parameter         | Statistical result                             | p-value       | Statistical test | Effect size (r) | Descriptive and pairwise comparison |                                 |                   |         |
| D                 | 1st EPSC quantal content                       | H(3)=3,476    | p=0,324          | <sup>(1)</sup>  | n.a.                                |                                 |                   |         |
| Figure references | Statistical test (between groups comparison)   |               |                  |                 |                                     | Accepted $\alpha$ -significance |                   | Sample  |
|                   | <sup>(1)</sup> One-way repeated measures ANOVA |               |                  |                 |                                     | 0,008                           |                   |         |
|                   | <sup>(2)</sup> Kruskal-Wallis Test             |               |                  |                 |                                     | 0.05                            |                   |         |
|                   | Statistical test (within groups comparison)    |               |                  |                 |                                     |                                 |                   |         |
|                   |                                                |               |                  |                 | groups                              | comparisons                     | Corrected p-value |         |
| F                 | PP ratio 1                                     | H(3)=19,818   | p=0,000          | <sup>(2)</sup>  | 1,681                               | eGFP*: 0,90 ± 0,063             | eGFP vs WT        | p=1     |
|                   |                                                |               |                  |                 |                                     | WT*: 0,78 ± 0,039               | eGFP vs DN        | p=0,001 |
|                   |                                                |               |                  |                 |                                     | DN*: 0,66 ± 0,030               | eGFP vs 6A        | p=0,002 |
|                   |                                                |               |                  |                 |                                     | 6A*: 0,68 ± 0,025               | WT vs DN          | p=0,057 |
|                   |                                                |               |                  |                 | WT vs 6A                            | p=0,146                         |                   |         |
|                   |                                                |               |                  |                 | DN vs 6A                            | p=1                             |                   |         |
| F                 | PP ratio 2                                     | H(3)=23,150   | p=0,000          | <sup>(2)</sup>  | 1,964                               | eGFP*: 0,92 ± 0,036             | eGFP vs WT        | p=1     |
|                   |                                                |               |                  |                 |                                     | WT*: 0,84 ± 0,034               | eGFP vs DN        | p=0,000 |
|                   |                                                |               |                  |                 |                                     | DN*: 0,74 ± 0,029               | eGFP vs 6A        | p=0,002 |
|                   |                                                |               |                  |                 |                                     | 6A*: 0,75 ± 0,028               | WT vs DN          | p=0,014 |
|                   |                                                |               |                  |                 | WT vs 6A                            | p=0,083                         |                   |         |
|                   |                                                |               |                  |                 | DN vs 6A                            | p=1                             |                   |         |
| F                 | PP ratio 3                                     | F(3,75)=8,465 | p=0,000          | <sup>(1)</sup>  | 0,859                               | eGFP*: 0,93 ± 0,038             | eGFP vs WT        | p=0,456 |
|                   |                                                |               |                  |                 |                                     | WT*: 0,86 ± 0,035               | eGFP vs DN        | p=0,013 |
|                   |                                                |               |                  |                 |                                     | DN*: 0,75 ± 0,026               | eGFP vs 6A        | p=0,000 |
|                   |                                                |               |                  |                 |                                     | 6A*: 0,74 ± 0,022               | WT vs DN          | p=0,475 |
|                   |                                                |               |                  |                 | WT vs 6A                            | p=0,084                         |                   |         |
|                   |                                                |               |                  |                 | DN vs 6A                            | p=1                             |                   |         |
| F                 | PP ratio 4                                     | H(3)=20,454   | p=0,000          | <sup>(2)</sup>  | 1,735                               | eGFP*: 0,89 ± 0,040             | eGFP vs WT        | p=1     |
|                   |                                                |               |                  |                 |                                     | WT*: 0,84 ± 0,031               | eGFP vs DN        | p=0,002 |
|                   |                                                |               |                  |                 |                                     | DN*: 0,75 ± 0,026               | eGFP vs 6A        | p=0,003 |
|                   |                                                |               |                  |                 |                                     | 6A*: 0,77 ± 0,017               | WT vs DN          | p=0,023 |
|                   |                                                |               |                  |                 | WT vs 6A                            | p=0,042                         |                   |         |
|                   |                                                |               |                  |                 | DN vs 6A                            | p=1                             |                   |         |
| F                 | PP ratio 5                                     | H(3)=22,178   | p=0,000          | <sup>(2)</sup>  | 1,881                               | eGFP*: 0,89 ± 0,026             | eGFP vs WT        | p=1     |
|                   |                                                |               |                  |                 |                                     | WT*: 0,87 ± 0,026               | eGFP vs DN        | p=0,010 |
|                   |                                                |               |                  |                 |                                     | DN*: 0,77 ± 0,022               | eGFP vs 6A        | p=0,009 |
|                   |                                                |               |                  |                 |                                     | 6A*: 0,78 ± 0,015               | WT vs DN          | p=0,003 |
|                   |                                                |               |                  |                 | WT vs 6A                            | p=0,002                         |                   |         |
|                   |                                                |               |                  |                 | DN vs 6A                            | p=1                             |                   |         |
| F                 | PP ratio 6                                     | H(3)=32,730   | p=0,000          | <sup>(2)</sup>  | 2,776                               | eGFP*: 0,89 ± 0,029             | eGFP vs WT        | p=0,488 |
|                   |                                                |               |                  |                 |                                     | WT*: 0,91 ± 0,025               | eGFP vs DN        | p=0,055 |
|                   |                                                |               |                  |                 |                                     | DN*: 0,80 ± 0,021               | eGFP vs 6A        | p=0,015 |
|                   |                                                |               |                  |                 |                                     | 6A*: 0,80 ± 0,014               | WT vs DN          | p=0,000 |
|                   |                                                |               |                  |                 | WT vs 6A                            | p=0,000                         |                   |         |
|                   |                                                |               |                  |                 | DN vs 6A                            | p=1                             |                   |         |

Figure 6. Doc2b mutants affect synaptic strength rundown during repetitive stimulations in DKO neurons

| Figure references | Statistical test (between groups comparison) |             |                  |                 |                                     | Accepted $\alpha$ -significance     |                   | Sample  |
|-------------------|----------------------------------------------|-------------|------------------|-----------------|-------------------------------------|-------------------------------------|-------------------|---------|
|                   | <sup>(1)</sup> Kruskal-Wallis Test           |             |                  |                 |                                     | 0,0167                              |                   |         |
|                   | Statistical test (within groups comparison)  |             |                  |                 |                                     | 0.05                                |                   |         |
|                   | Pairwise comparison                          |             |                  |                 |                                     |                                     |                   |         |
| Parameter         | Statistical result                           | p-value     | Statistical test | Effect size (r) | Descriptive and pairwise comparison |                                     |                   |         |
|                   |                                              |             |                  |                 | groups                              | comparisons                         | Corrected p-value |         |
| E                 | Cumulative total charge                      | H(3)=2,380  | p=0,497          | <sup>(1)</sup>  | n.a.                                |                                     |                   |         |
| F                 | Cumulative normalized charge                 | H(3)=27,255 | p=0,000          | <sup>(1)</sup>  | 2,664                               | eGFP*: 59,94 ± 5,61                 | eGFP vs WT        | p=0,606 |
|                   |                                              |             |                  |                 |                                     | WT*: 70,91 ± 5,07                   | eGFP vs DN        | p=0,338 |
|                   |                                              |             |                  |                 |                                     | DN*: 44,72 ± 2,25                   | eGFP vs 6A        | p=0,015 |
|                   |                                              |             |                  |                 |                                     | 6A*: 39,30 ± 1,85                   | WT vs DN          | p=0,002 |
|                   |                                              |             |                  |                 | WT vs 6A                            | p=0,000                             |                   |         |
|                   |                                              |             |                  |                 | DN vs 6A                            | p=1                                 |                   |         |
| G                 | Synchronous & Asynchronous charge proportion | H(3)=10,386 | p=0,016          | <sup>(1)</sup>  | 1,005                               | eGFP*: 0,83 ± 0,013 vs 0,17 ± 0,013 | eGFP vs WT        | p=0,013 |
|                   |                                              |             |                  |                 |                                     | WT*: 0,76 ± 0,014 vs 0,24 ± 0,014   | eGFP vs DN        | p=0,391 |
|                   |                                              |             |                  |                 |                                     | DN*: 0,79 ± 0,022 vs 0,21 ± 0,022   | eGFP vs 6A        | p=1     |
|                   |                                              |             |                  |                 |                                     | 6A*: 0,81 ± 0,016 vs 0,19 ± 0,016   | WT vs DN          | p=1     |
|                   |                                              |             |                  |                 | WT vs 6A                            | p=0,263                             |                   |         |
|                   |                                              |             |                  |                 | DN vs 6A                            | p=1                                 |                   |         |
| H                 | Recovery 5Hz                                 | H(3)=10,714 | p=0,013          | <sup>(1)</sup>  | 1,036                               | eGFP*: 0,52 ± 0,059                 | eGFP vs WT        | p=0,217 |
|                   |                                              |             |                  |                 |                                     | WT*: 0,60 ± 0,049                   | eGFP vs DN        | p=1     |
|                   |                                              |             |                  |                 |                                     | DN*: 0,48 ± 0,031                   | eGFP vs 6A        | p=1     |
|                   |                                              |             |                  |                 |                                     | 6A*: 0,42 ± 0,024                   | WT vs DN          | p=0,221 |
|                   |                                              |             |                  |                 | WT vs 6A                            | p=0,013                             |                   |         |
|                   |                                              |             |                  |                 | DN vs 6A                            | p=1                                 |                   |         |
| Figure references | Statistical test (between groups comparison) |             |                  |                 |                                     | Accepted $\alpha$ -significance     |                   | Sample  |
|                   | <sup>(1)</sup> Kruskal-Wallis Test           |             |                  |                 |                                     | 0,0167                              |                   |         |
|                   | Statistical test (within groups comparison)  |             |                  |                 |                                     | 0.05                                |                   |         |
|                   | Pairwise comparison                          |             |                  |                 |                                     |                                     |                   |         |
| Parameter         | Statistical result                           | p-value     | Statistical test | Effect size (r) | Descriptive and pairwise comparison |                                     |                   |         |
|                   |                                              |             |                  |                 | groups                              | comparisons                         | Corrected p-value |         |
| M                 | Cumulative total charge                      | H(3)=1,082  | p=0,781          | <sup>(1)</sup>  | n.a.                                |                                     |                   |         |
| N                 | Cumulative normalized charge                 | H(3)=19,425 | p=0,000          | <sup>(1)</sup>  | 1,933                               | eGFP*: 43,34 ± 3,69                 | eGFP vs WT        | p=1     |
|                   |                                              |             |                  |                 |                                     | WT*: 45,85 ± 3,40                   | eGFP vs DN        | p=0,114 |
|                   |                                              |             |                  |                 |                                     | DN*: 33,88 ± 4,75                   | eGFP vs 6A        | p=0,024 |
|                   |                                              |             |                  |                 |                                     | 6A*: 29,20 ± 3,09                   | WT vs DN          | p=0,010 |
|                   |                                              |             |                  |                 | WT vs 6A                            | p=0,001                             |                   |         |
|                   |                                              |             |                  |                 | DN vs 6A                            | p=1                                 |                   |         |
| O                 | Synchronous & Asynchronous charge proportion | H(3)=7,705  | p=0,053          | <sup>(1)</sup>  | n.a.                                |                                     |                   |         |
| P                 | Recovery 40Hz                                | H(3)=16,682 | p=0,001          | <sup>(1)</sup>  | 1,660                               | eGFP*: 0,81 ± 0,064                 | eGFP vs WT        | p=0,181 |
|                   |                                              |             |                  |                 |                                     | WT*: 0,99 ± 0,076                   | eGFP vs DN        | p=1     |
|                   |                                              |             |                  |                 |                                     | DN*: 0,076 ± 0,061                  | eGFP vs 6A        | p=0,738 |
|                   |                                              |             |                  |                 |                                     | 6A*: 0,68 ± 0,030                   | WT vs DN          | p=0,025 |
|                   |                                              |             |                  |                 | WT vs 6A                            | p=0,001                             |                   |         |
|                   |                                              |             |                  |                 | DN vs 6A                            | p=1                                 |                   |         |
| R                 | RRP size (pC)                                | H(3)=1,073  | p=0,784          | <sup>(1)</sup>  | n.a.                                |                                     |                   |         |
| S                 | Release probability                          | H(3)=11,453 | p=0,010          | <sup>(1)</sup>  | 1,150                               | eGFP*: 0,349 ± 0,032                | eGFP vs WT        | p=1     |
|                   |                                              |             |                  |                 |                                     | WT*: 0,430 ± 0,050                  | eGFP vs DN        | p=0,348 |
|                   |                                              |             |                  |                 |                                     | DN*: 0,472 ± 0,051                  | eGFP vs 6A        | p=0,010 |
|                   |                                              |             |                  |                 |                                     | 6A*: 0,560 ± 0,051                  | WT vs DN          | p=1     |
|                   |                                              |             |                  |                 | WT vs 6A                            | p=0,067                             |                   |         |
|                   |                                              |             |                  |                 | DN vs 6A                            | p=1                                 |                   |         |

| Figure 7. Overexpression of Doc2bWT, Doc2bDN, and Doc2b6A does not affect morphology or synapse number in wildtype neurons | Figure references  | Statistical test (between groups comparison)   |                  |                 |                                     | Accepted $\alpha$ -significance | Sample                                |
|----------------------------------------------------------------------------------------------------------------------------|--------------------|------------------------------------------------|------------------|-----------------|-------------------------------------|---------------------------------|---------------------------------------|
|                                                                                                                            |                    | <sup>(1)</sup> One-way repeated measures ANOVA |                  |                 |                                     |                                 |                                       |
|                                                                                                                            |                    | <sup>(2)</sup> Kruskal-Wallis Test             |                  |                 |                                     | 0,01                            | n = 168, N = 3 independent experiment |
|                                                                                                                            |                    | Statistical test (within groups comparison)    |                  |                 |                                     |                                 |                                       |
|                                                                                                                            |                    | Pairwise comparison                            |                  |                 |                                     |                                 |                                       |
| Parameter                                                                                                                  | Statistical result | p-value                                        | Statistical test | Effect size (r) | Descriptive and pairwise comparison |                                 |                                       |
|                                                                                                                            |                    |                                                |                  |                 | groups                              | comparisons                     | Corrected p-value                     |
| B                                                                                                                          | Synapse number     | H(3)=3,452                                     | p=0,327          | <sup>(2)</sup>  | n.a.                                |                                 |                                       |
| B                                                                                                                          | Dendritic length   | F(3,117)=0,465                                 | p=0,707          | <sup>(1)</sup>  | n.a.                                |                                 |                                       |
| B                                                                                                                          | Synapses/ $\mu$ m  | H(3)=5,247                                     | p=0,155          | <sup>(2)</sup>  | n.a.                                |                                 |                                       |
| B                                                                                                                          | Synapse area       | H(3)=4,883                                     | p=0,181          | <sup>(2)</sup>  | n.a.                                |                                 |                                       |
| B                                                                                                                          | Soma area          | H(3)=0,476                                     | p=0,924          | <sup>(2)</sup>  | n.a.                                |                                 |                                       |

| Figure S2. Doc2b <sup>DN</sup> and Doc2b <sup>6A</sup> mutations enhance the frequency of spontaneous release in wildtype hippocampal neurons | Figure references                            | Statistical test (between groups comparison) |                    |                  |                                 | Accepted $\alpha$ -significance       | Sample                                |                                     |                                     |
|-----------------------------------------------------------------------------------------------------------------------------------------------|----------------------------------------------|----------------------------------------------|--------------------|------------------|---------------------------------|---------------------------------------|---------------------------------------|-------------------------------------|-------------------------------------|
|                                                                                                                                               |                                              | <sup>(1)</sup> Kruskal-Wallis Test           |                    |                  |                                 |                                       |                                       |                                     |                                     |
|                                                                                                                                               |                                              | Statistical test (within groups comparison)  |                    |                  |                                 | 0,05                                  | n = 183, N = 4 independent experiment |                                     |                                     |
|                                                                                                                                               |                                              | Pairwise comparison                          |                    |                  |                                 |                                       |                                       |                                     |                                     |
|                                                                                                                                               |                                              | Parameter                                    | Statistical result | p-value          | Statistical test                |                                       |                                       | Effect size (r)                     | Descriptive and pairwise comparison |
|                                                                                                                                               | groups                                       |                                              |                    |                  |                                 | comparisons                           | Corrected p-value                     |                                     |                                     |
|                                                                                                                                               | B                                            | mEPSC frequency                              | H(3)=73,308        | p=0,000          | <sup>(1)</sup>                  | 5,863                                 | eGFP*: 4,33 $\pm$ 0,544               | eGFP vs WT                          | p=1                                 |
|                                                                                                                                               |                                              |                                              |                    |                  |                                 |                                       | WT*: 4,64 $\pm$ 0,628                 | eGFP vs DN                          | p=0,000                             |
|                                                                                                                                               |                                              |                                              |                    |                  |                                 |                                       | DN*: 15,67 $\pm$ 1,830                | eGFP vs 6A                          | p=0,000                             |
|                                                                                                                                               |                                              |                                              |                    |                  |                                 |                                       | 6A*: 16,51 $\pm$ 1,842                | WT vs DN                            | p=0,000                             |
|                                                                                                                                               |                                              |                                              |                    |                  |                                 |                                       | WT vs 6A                              | p=0,000                             |                                     |
|                                                                                                                                               | DN vs 6A                                     | p=1                                          |                    |                  |                                 |                                       |                                       |                                     |                                     |
| C                                                                                                                                             | mEPSC amplitude                              | H(3)=1,851                                   | p=0,604            | <sup>(1)</sup>   | n.a.                            |                                       |                                       |                                     |                                     |
| D                                                                                                                                             | mEPSC area                                   | H(3)=2,678                                   | p=0,444            | <sup>(1)</sup>   | n.a.                            |                                       |                                       |                                     |                                     |
| E                                                                                                                                             | mEPSC rise                                   | H(3)=1,937                                   | p=0,586            | <sup>(1)</sup>   | n.a.                            |                                       |                                       |                                     |                                     |
| F                                                                                                                                             | mEPSC decay                                  | H(3)=0,839                                   | p=0,840            | <sup>(1)</sup>   | n.a.                            |                                       |                                       |                                     |                                     |
| Figure references                                                                                                                             | Statistical test (between groups comparison) |                                              |                    |                  | Accepted $\alpha$ -significance | Sample                                |                                       |                                     |                                     |
|                                                                                                                                               | <sup>(1)</sup> Kruskal-Wallis Test           |                                              |                    |                  |                                 |                                       |                                       |                                     |                                     |
|                                                                                                                                               | Statistical test (within groups comparison)  |                                              |                    |                  | 0,05                            | n = 218, N = 6 independent experiment |                                       |                                     |                                     |
|                                                                                                                                               | Pairwise comparison                          |                                              |                    |                  |                                 |                                       |                                       |                                     |                                     |
|                                                                                                                                               | Parameter                                    | Statistical result                           | p-value            | Statistical test |                                 |                                       | Effect size (r)                       | Descriptive and pairwise comparison |                                     |
|                                                                                                                                               |                                              |                                              |                    |                  | groups                          | comparisons                           |                                       | Corrected p-value                   |                                     |
|                                                                                                                                               | H                                            | mEPSC frequency                              | H(3)=104,468       | p=0,000          | <sup>(1)</sup>                  | 7,075                                 | eGFP*: 10,62 $\pm$ 1,093              | eGFP vs WT                          | p=1                                 |
|                                                                                                                                               |                                              |                                              |                    |                  |                                 |                                       | WT*: 9,71 $\pm$ 1,171                 | eGFP vs DN                          | p=0,000                             |
|                                                                                                                                               |                                              |                                              |                    |                  |                                 |                                       | DN*: 31,90 $\pm$ 1,736                | eGFP vs 6A                          | p=0,000                             |
|                                                                                                                                               |                                              |                                              |                    |                  |                                 |                                       | 6A*: 30,06 $\pm$ 2,300                | WT vs DN                            | p=0,000                             |
|                                                                                                                                               |                                              |                                              |                    |                  |                                 |                                       | WT vs 6A                              | p=0,000                             |                                     |
|                                                                                                                                               | DN vs 6A                                     | p=1                                          |                    |                  |                                 |                                       |                                       |                                     |                                     |
| I                                                                                                                                             | mEPSC amplitude                              | H(3)=2,407                                   | p=0,492            | <sup>(1)</sup>   | n.a.                            |                                       |                                       |                                     |                                     |
| J                                                                                                                                             | mEPSC area                                   | H(3)=4,373                                   | p=0,224            | <sup>(1)</sup>   | n.a.                            |                                       |                                       |                                     |                                     |
| K                                                                                                                                             | mEPSC rise time                              | H(3)=9,060                                   | p=0,029            | <sup>(1)</sup>   | 0,614                           |                                       |                                       |                                     |                                     |
| L                                                                                                                                             | mEPSC decay Time                             | H(3)=18,609                                  | p=0,000            | <sup>(1)</sup>   | 1,260                           | eGFP*: 6,07 $\pm$ 0,127               | eGFP vs WT                            | p=0,238                             |                                     |
|                                                                                                                                               |                                              |                                              |                    |                  |                                 | WT*: 5,62 $\pm$ 0,137                 | eGFP vs DN                            | p=1                                 |                                     |
|                                                                                                                                               |                                              |                                              |                    |                  |                                 | DN*: 6,36 $\pm$ 0,185                 | eGFP vs 6A                            | p=0,327                             |                                     |
|                                                                                                                                               |                                              |                                              |                    |                  |                                 | 6A*: 6,64 $\pm$ 0,222                 | WT vs DN                              | p=0,012                             |                                     |
|                                                                                                                                               |                                              |                                              |                    |                  |                                 |                                       | WT vs 6A                              | p=0,000                             |                                     |
|                                                                                                                                               | DN vs 6A                                     | p=1                                          |                    |                  |                                 |                                       |                                       |                                     |                                     |

Figure S3. Doc2b mutants affect short term plasticity in WT autaptic neurons

| Figure references | Statistical test (between groups comparison)   |                    |                  |                  |                                     | Accepted $\alpha$ -significance |                   | Sample                                |
|-------------------|------------------------------------------------|--------------------|------------------|------------------|-------------------------------------|---------------------------------|-------------------|---------------------------------------|
|                   | <sup>(1)</sup> One-way repeated measures ANOVA |                    |                  |                  |                                     | 0,025                           |                   | n = 157, N = 6 independent experiment |
|                   | <sup>(2)</sup> Kruskal-Wallis Test             |                    |                  |                  |                                     |                                 |                   |                                       |
|                   | Statistical test (within groups comparison)    |                    |                  |                  |                                     | 0,05                            |                   |                                       |
|                   | Pairwise comparison                            |                    |                  |                  |                                     |                                 |                   |                                       |
| Parameter         | Statistical result                             | p-value            | Statistical test | Effect size (r)  | Descriptive and pairwise comparison |                                 |                   |                                       |
|                   |                                                |                    |                  |                  | groups                              | comparisons                     | Corrected p-value |                                       |
| B                 | 1st EPSC amplitude                             | F(3,111)= 1,427    | p=0,239          | <sup>(1)</sup>   | n.a.                                | eGFP*: 137,96 ± 12,691          | eGFP vs WT        | p=0,211                               |
| C                 | 1st EPSC charge                                | H(3)=11,041        | p=0,012          | <sup>(2)</sup>   | 0,881                               | WT*: 98,096 ± 10,515            | eGFP vs DN        | p=1                                   |
|                   |                                                |                    |                  |                  |                                     | DN*: 163,43 ± 17,967            | eGFP vs 6A        | p=1                                   |
|                   |                                                |                    |                  |                  |                                     | 6A*: 174,28 ± 19,616            | WT vs DN          | p=0,043                               |
|                   |                                                |                    |                  |                  |                                     |                                 | WT vs 6A          | p=0,013                               |
|                   |                                                |                    |                  |                  |                                     |                                 | DN vs 6A          | p=1                                   |
| Figure references | Statistical test (between groups comparison)   |                    |                  |                  |                                     | Accepted $\alpha$ -significance |                   | Sample                                |
|                   | <sup>(1)</sup> One-way repeated measures ANOVA |                    |                  |                  |                                     | 0,008                           |                   | n = 165, N = 6 independent experiment |
|                   | <sup>(2)</sup> Kruskal-Wallis Test             |                    |                  |                  |                                     |                                 |                   |                                       |
|                   | Statistical test (within groups comparison)    |                    |                  |                  |                                     | 0,05                            |                   |                                       |
|                   | Pairwise comparison                            |                    |                  |                  |                                     |                                 |                   |                                       |
| Parameter         | Statistical result                             | p-value            | Statistical test | Effect size (r)  | Descriptive and pairwise comparison |                                 |                   |                                       |
|                   |                                                |                    |                  |                  | groups                              | comparisons                     | Corrected p-value |                                       |
| D                 | PP ratio 1                                     | H(3)=21,561        | p=0,000          | <sup>(2)</sup>   | 1,680                               | eGFP*: 0,86 ± 0,037             | eGFP vs WT        | p=1                                   |
|                   |                                                |                    |                  |                  |                                     | WT*: 0,85 ± 0,031               | eGFP vs DN        | p=0,013                               |
|                   |                                                |                    |                  |                  |                                     | DN*: 0,70 ± 0,029               | eGFP vs 6A        | p=0,005                               |
|                   |                                                |                    |                  |                  |                                     | 6A*: 0,70 ± 0,026               | WT vs DN          | p=0,007                               |
|                   |                                                |                    |                  |                  |                                     |                                 | WT vs 6A          | p=0,003                               |
| D                 | PP ratio 2                                     | F(3,108)=12,620    | p=0,000          | <sup>(1)</sup>   | 0,899                               | eGFP*: 1,01 ± 0,034             | eGFP vs WT        | p=1                                   |
|                   |                                                |                    |                  |                  |                                     | WT*: 0,96 ± 0,026               | eGFP vs DN        | p=0,002                               |
|                   |                                                |                    |                  |                  |                                     | DN*: 0,81 ± 0,025               | eGFP vs 6A        | p=0,000                               |
|                   |                                                |                    |                  |                  |                                     | 6A*: 0,78 ± 0,024               | WT vs DN          | p=0,006                               |
|                   |                                                |                    |                  |                  |                                     |                                 | WT vs 6A          | p=0,000                               |
| D                 | PP ratio 3                                     | F(3,108)=15,793    | p=0,000          | <sup>(1)</sup>   | 0,917                               | eGFP*: 0,96 ± 0,020             | eGFP vs WT        | p=1                                   |
|                   |                                                |                    |                  |                  |                                     | WT*: 0,94 ± 0,022               | eGFP vs DN        | p=0,000                               |
|                   |                                                |                    |                  |                  |                                     | DN*: 0,82 ± 0,017               | eGFP vs 6A        | p=0,000                               |
|                   |                                                |                    |                  |                  |                                     | 6A*: 0,78 ± 0,022               | WT vs DN          | p=0,004                               |
|                   |                                                |                    |                  |                  |                                     |                                 | WT vs 6A          | p=0,000                               |
| D                 | PP ratio 4                                     | H(3)=48,157        | p=0,000          | <sup>(2)</sup>   | 3,749                               | eGFP*: 0,94 ± 0,017             | eGFP vs WT        | p=1                                   |
|                   |                                                |                    |                  |                  |                                     | WT*: 0,91 ± 0,015               | eGFP vs DN        | p=0,000                               |
|                   |                                                |                    |                  |                  |                                     | DN*: 0,82 ± 0,012               | eGFP vs 6A        | p=0,000                               |
|                   |                                                |                    |                  |                  |                                     | 6A*: 0,79 ± 0,019               | WT vs DN          | p=0,000                               |
|                   |                                                |                    |                  |                  |                                     |                                 | WT vs 6A          | p=0,000                               |
| D                 | PP ratio 5                                     | H(3)=40,339        | p=0,000          | <sup>(2)</sup>   | 3,140                               | eGFP*: 0,89 ± 0,017             | eGFP vs WT        | p=1                                   |
|                   |                                                |                    |                  |                  |                                     | WT*: 0,91 ± 0,014               | eGFP vs DN        | p=0,003                               |
|                   |                                                |                    |                  |                  |                                     | DN*: 0,82 ± 0,011               | eGFP vs 6A        | p=0,000                               |
|                   |                                                |                    |                  |                  |                                     | 6A*: 0,80 ± 0,013               | WT vs DN          | p=0,000                               |
|                   |                                                |                    |                  |                  |                                     |                                 | WT vs 6A          | p=0,000                               |
| D                 | PP ratio 6                                     | H(3)=52,625        | p=0,000          | <sup>(2)</sup>   | 4,097                               | eGFP*: 0,89 ± 0,009             | eGFP vs WT        | p=0,158                               |
|                   |                                                |                    |                  |                  |                                     | WT*: 0,94 ± 0,011               | eGFP vs DN        | p=0,006                               |
|                   |                                                |                    |                  |                  |                                     | DN*: 0,84 ± 0,010               | eGFP vs 6A        | p=0,000                               |
|                   |                                                |                    |                  |                  |                                     | 6A*: 0,81 ± 0,014               | WT vs DN          | p=0,000                               |
|                   |                                                |                    |                  |                  |                                     |                                 | WT vs 6A          | p=0,000                               |
|                   | DN vs 6A                                       | p=1                |                  |                  |                                     |                                 |                   |                                       |
| Figure references | Statistical test (between groups comparison)   |                    |                  |                  |                                     | Accepted $\alpha$ -significance |                   | Sample                                |
|                   | <sup>(1)</sup> Kruskal-Wallis Test             |                    |                  |                  |                                     | 0,05                            |                   | n = 123, N = 6 independent experiment |
|                   | Statistical test (within groups comparison)    |                    |                  |                  |                                     |                                 |                   |                                       |
|                   | Pairwise comparison                            |                    |                  |                  |                                     | 0,05                            |                   |                                       |
|                   | Parameter                                      | Statistical result | p-value          | Statistical test | Effect size (r)                     |                                 |                   |                                       |
|                   |                                                |                    |                  |                  | groups                              | comparisons                     | Corrected p-value |                                       |
| E                 | 1 <sup>st</sup> EPSC quantal content           | H(3)=9,292         | p=0,026          | <sup>(1)</sup>   | 0,838                               | eGFP*: 0,89 ± 0,009             | eGFP vs WT        | p=0,933                               |
|                   |                                                |                    |                  |                  |                                     | WT*: 0,94 ± 0,011               | eGFP vs DN        | p=0,175                               |
|                   |                                                |                    |                  |                  |                                     | DN*: 0,84 ± 0,010               | eGFP vs 6A        | p=0,009                               |
|                   |                                                |                    |                  |                  |                                     | 6A*: 0,81 ± 0,014               | WT vs DN          | p=0,205                               |
|                   |                                                |                    |                  |                  |                                     |                                 | WT vs 6A          | p=0,012                               |
|                   | DN vs 6A                                       | p=0,177            |                  |                  |                                     |                                 |                   |                                       |

| Figure references | Statistical test (between groups comparison) |             |                  |                 |        | Accepted $\alpha$ -significance     |                   | Sample                                |
|-------------------|----------------------------------------------|-------------|------------------|-----------------|--------|-------------------------------------|-------------------|---------------------------------------|
|                   | <sup>(1)</sup> Kruskal-Wallis Test           |             |                  |                 |        | 0,0167                              |                   | n = 157, N = 6 independent experiment |
|                   | Statistical test (within groups comparison)  |             |                  |                 |        | 0.05                                |                   |                                       |
|                   | Pairwise comparison                          |             |                  |                 |        | Descriptive and pairwise comparison |                   |                                       |
| Parameter         | Statistical result                           | p-value     | Statistical test | Effect size (r) | groups | comparisons                         | Corrected p-value |                                       |
| I                 | Cumulative total charge                      | H(3)=4,21   | p=0,240          | <sup>(1)</sup>  | n.a.   | eGFP*: 61,51 ± 3,277                | eGFP vs WT        | p=0,292                               |
| J                 | Cumulative normalized charge                 | H(3)=59,983 | p=0,000          | <sup>(1)</sup>  | 4,787  | WT*: 72,13 ± 3,391                  | eGFP vs DN        | p=0,000                               |
|                   |                                              |             |                  |                 |        | DN*: 44,23 ± 2,352                  | eGFP vs 6A        | p=0,000                               |
|                   |                                              |             |                  |                 |        | 6A*: 41,57 ± 2,121                  | WT vs DN          | p=0,000                               |
|                   |                                              |             |                  |                 |        |                                     | WT vs 6A          | p=0,000                               |
|                   |                                              |             |                  |                 |        | DN vs 6A                            | p=1               |                                       |
| K                 | Synchronous & Asynchronous charge proportion | H(3)=1,977  | p=0,577          | <sup>(1)</sup>  | n.a.   |                                     |                   |                                       |
| L                 | Recovery 5Hz                                 | H(3)=24,758 | p=0,000          | <sup>(1)</sup>  | 1,976  | eGFP*: 0,52 ± 0,025                 | eGFP vs WT        | p=0,012                               |
|                   |                                              |             |                  |                 |        | WT*: 0,67 ± 0,035                   | eGFP vs DN        | p=1                                   |
|                   |                                              |             |                  |                 |        | DN*: 0,50 ± 0,019                   | eGFP vs 6A        | p=0,654                               |
|                   |                                              |             |                  |                 |        | 6A*: 0,48 ± 0,018                   | WT vs DN          | p=0,000                               |
|                   |                                              |             |                  |                 |        |                                     | WT vs 6A          | p=0,000                               |
|                   |                                              |             |                  |                 |        | DN vs 6A                            | p=1               |                                       |
| Figure references | Statistical test (between groups comparison) |             |                  |                 |        | Accepted $\alpha$ -significance     |                   | Sample                                |
|                   | <sup>(1)</sup> Kruskal-Wallis Test           |             |                  |                 |        | 0,0167                              |                   | n = 144, N = 6 independent experiment |
|                   | Statistical test (within groups comparison)  |             |                  |                 |        | 0.05                                |                   |                                       |
|                   | Pairwise comparison                          |             |                  |                 |        | Descriptive and pairwise comparison |                   |                                       |
| Parameter         | Statistical result                           | p-value     | Statistical test | Effect size (r) | groups | comparisons                         | Corrected p-value |                                       |
| P                 | Cumulative total charge                      | H(3)=4,868  | p=0,182          | <sup>(1)</sup>  | n.a.   | eGFP*: 39,83 ± 2,265                | eGFP vs WT        | p=1                                   |
| Q                 | Cumulative normalized charge                 | H(3)=42,608 | p=0,000          | <sup>(1)</sup>  | 3,551  | WT*: 45,07 ± 3,634                  | eGFP vs DN        | p=0,000                               |
|                   |                                              |             |                  |                 |        | DN*: 24,86 ± 1,491                  | eGFP vs 6A        | p=0,000                               |
|                   |                                              |             |                  |                 |        | 6A*: 26,08 ± 1,821                  | WT vs DN          | p=0,000                               |
|                   |                                              |             |                  |                 |        |                                     | WT vs 6A          | p=0,000                               |
|                   |                                              |             |                  |                 |        | DN vs 6A                            | p=1               |                                       |
| R                 | Synchronous & Asynchronous charge proportion | H(3)=8,082  | p=0,044          | <sup>(1)</sup>  | 0,674  | eGFP*: 0,14 ± 0,008 vs 0,86 ± 0,008 | eGFP vs WT        | p=0,894                               |
|                   |                                              |             |                  |                 |        | WT*: 0,15 ± 0,007 vs 0,85 ± 0,007   | eGFP vs DN        | p=0,027                               |
|                   |                                              |             |                  |                 |        | DN*: 0,18 ± 0,012 vs 0,82 ± 0,012   | eGFP vs 6A        | p=0,893                               |
|                   |                                              |             |                  |                 |        | 6A*: 0,17 ± 0,013 vs 0,83 ± 0,013   | WT vs DN          | p=1                                   |
|                   |                                              |             |                  |                 |        |                                     | WT vs 6A          | p=1                                   |
|                   |                                              |             |                  |                 |        | DN vs 6A                            | p=0,991           |                                       |
| S                 | Recovery 40Hz                                | H(3)=52,978 | p=0,000          | <sup>(1)</sup>  | 4,415  | eGFP*: 0,76 ± 0,035                 | eGFP vs WT        | p=0,000                               |
|                   |                                              |             |                  |                 |        | WT*: 1,15 ± 0,063                   | eGFP vs DN        | p=1                                   |
|                   |                                              |             |                  |                 |        | DN*: 0,70 ± 0,029                   | eGFP vs 6A        | p=0,038                               |
|                   |                                              |             |                  |                 |        | 6A*: 0,62 ± 0,028                   | WT vs DN          | p=0,000                               |
|                   |                                              |             |                  |                 |        | WT vs 6A                            | p=0,000           |                                       |
|                   |                                              |             |                  |                 |        | DN vs 6A                            | p=0,816           |                                       |
| T                 | RRP size (pC)                                | H(3)=2,489  | p=0,477          | <sup>(1)</sup>  | n.a.   |                                     |                   |                                       |
| U                 | Release probability                          | H(3)=23,666 | p=0,000          | <sup>(1)</sup>  | 1,980  | eGFP*: 0,319 ± 0,023                | eGFP vs WT        | p=1                                   |
|                   |                                              |             |                  |                 |        | WT*: 0,280 ± 0,021                  | eGFP vs DN        | p=0,054                               |
|                   |                                              |             |                  |                 |        | DN*: 0,421 ± 0,031                  | eGFP vs 6A        | p=0,005                               |
|                   |                                              |             |                  |                 |        | 6A*: 0,430 ± 0,025                  | WT vs DN          | p=0,004                               |
|                   |                                              |             |                  |                 |        | WT vs 6A                            | p=0,000           |                                       |
|                   |                                              |             |                  |                 |        | DN vs 6A                            | p=1               |                                       |

| Figure references | Statistical test (between groups comparison)   |               |                  |                 |        | Accepted $\alpha$ -significance     |                   | Sample                               |
|-------------------|------------------------------------------------|---------------|------------------|-----------------|--------|-------------------------------------|-------------------|--------------------------------------|
|                   | <sup>(1)</sup> One-way repeated measures ANOVA |               |                  |                 |        | 0,05                                |                   | n = 54, N = 3 independent experiment |
|                   | Statistical test (within groups comparison)    |               |                  |                 |        | 0.05                                |                   |                                      |
|                   | Pairwise comparison                            |               |                  |                 |        | Descriptive and pairwise comparison |                   |                                      |
| Parameter         | Statistical result                             | p-value       | Statistical test | Effect size (r) | groups | comparisons                         | Corrected p-value |                                      |
| C                 | 1st EPSC amplitude                             | F(1,27)=0,035 | p=0,854          | <sup>(1)</sup>  | n.a.   |                                     |                   |                                      |
| Figure references | Statistical test (between groups comparison)   |               |                  |                 |        | Accepted $\alpha$ -significance     |                   | Sample                               |
|                   | <sup>(2)</sup> Mann-Whitney test               |               |                  |                 |        | 0,025                               |                   | n = 49, N = 3 independent experiment |
|                   | Statistical test (within groups comparison)    |               |                  |                 |        | 0.05                                |                   |                                      |
|                   | Pairwise comparison                            |               |                  |                 |        | Descriptive and pairwise comparison |                   |                                      |
| Parameter         | Statistical result                             | p-value       | Statistical test | Effect size (r) | groups | comparisons                         | Corrected p-value |                                      |
| D                 | Calcimycin peak amplitude                      | U=281         | p=0,718          | <sup>(2)</sup>  | n.a.   |                                     |                   |                                      |
| E                 | Calcimycin total charge(nC)                    | U=269         | p=0,548          | <sup>(2)</sup>  | n.a.   |                                     |                   |                                      |
